# Supplementary material for: Naturally Acquired Antibody Response to Malaria Transmission Blocking Vaccine Candidate Pvs230 Domain 1
Source: Front Immunol. 2019 Oct 4;10:2295. doi: 10.3389/fimmu.2019.02295 (PMC6788386; doi:10.3389/fimmu.2019.02295)
Supplement: Table S1 — Background data for all subjects from Brazil and Cambodia. Information on sex, age, hemoglobin levels, and parasitemia. Parasitemia data in Brazil, originally reported in semi-quantitative format, were converted to parasites per mm3 to be compared with data from Cambodia, reported as parasites/mm3. The conversions were: 12+ = 50–300 parasites/mm3; + = 301–500 parasites per mm3; ++ = 501–10,000 parasites/mm3; +++ = 10,001–100,000 parasites. [file Table_1.xlsx]

## Sheet: pivot chart
Column Labels
1-9 years old		10-19 years old		20 or older		Total Average of OD (Pvs230)	Total Average of OD (Pfs230)
Average of OD (Pvs230)	Average of OD (Pfs230)	Average of OD (Pvs230)	Average of OD (Pfs230)	Average of OD (Pvs230)	Average of OD (Pfs230)
0.861429	1.42857	0.884074	1.99704	1.04681	1.84894	1.0081	1.85612

## Sheet: data
Site	ID	Pv/µl	Parasitemia Brazil (crosses)	Parasitemia Cambodia (Parasites p/mm³)	Age Group	Age	Gender	Hb
Brazil	PV 1	N/A	1/2 +	50-300 parasites per mm3	20 or older	50	Male	N/A
Brazil	PV 2	N/A	++	501-10,000 parasites per mm3	20 or older	74	Male	N/A
Brazil	PV 3	N/A	+	301-500 parasites per mm3	20 or older	55	Male	13.9
Brazil	PV 4	N/A	+	301-500 parasites per mm3	20 or older	61	Male	12.2
Brazil	PV 5	N/A	+	301-500 parasites per mm3	20 or older	28	Male	14.6
Brazil	PV 7	N/A	+++	10,001-100,000 parasites per mm3	20 or older	33	Male	11.7
Brazil	PV 8	N/A	N/A	50-300 parasites per mm3	20 or older	26	Female	12.9
Brazil	PV 10	N/A	++	501-10,000 parasites per mm3	20 or older	31	Male	14
Brazil	PV 11	N/A	N/A	50-300 parasites per mm3	20 or older	56	Female	N/A
Brazil	PV 12	N/A	1/2 +	50-300 parasites per mm3	20 or older	38	Female	14.2
Brazil	PV 13	N/A	++	501-10,000 parasites per mm3	20 or older	38	Male	13.9
Brazil	PV 14	N/A	+	301-500 parasites per mm3	20 or older	68	Male	14.3
Brazil	PV 15	N/A	+	301-500 parasites per mm3	20 or older	50	Male	12.1
Brazil	PV 16	N/A	+++	10,001-100,000 parasites per mm3	20 or older	49	Female	N/A
Brazil	PV 17	N/A	++	501-10,000 parasites per mm3	20 or older	43	Male	13.2
Brazil	PV 18	N/A	++	501-10,000 parasites per mm3	20 or older	32	Male	14.8
Brazil	PV 19	N/A	+++	10,001-100,000 parasites per mm3	20 or older	26	Male	14.7
Brazil	PV 20	N/A	1/2 +	50-300 parasites per mm3	20 or older	28	Female	11.1
Brazil	PV 21	N/A	N/A	50-300 parasites per mm3	20 or older	40	Male	14.3
Brazil	PV 22	N/A	N/A	50-300 parasites per mm3	20 or older	30	Male	15.2
Brazil	PV 23	N/A	1/2 +	50-300 parasites per mm3	20 or older	63	Female	12.7
Brazil	PV 24	N/A	+++	10,001-100,000 parasites per mm3	20 or older	55	Male	N/A
Brazil	PV 25	N/A	++	501-10,000 parasites per mm3	20 or older	42	Male	N/A
Brazil	PV 26	N/A	1/2 +	50-300 parasites per mm3	20 or older	30	Female	N/A
Brazil	PV 32	N/A	++	501-10,000 parasites per mm3	20 or older	34	Male	N/A
Brazil	PV 33	N/A	++	501-10,000 parasites per mm3	20 or older	26	Female	N/A
Brazil	PV 34	N/A	+	301-500 parasites per mm3	20 or older	57	Male	N/A
Brazil	PV 35	N/A	+	301-500 parasites per mm3	20 or older	40	Female	13.1
Brazil	PV 36	N/A	+	301-500 parasites per mm3	20 or older	56	Male	15.3
Brazil	PV 37	N/A	N/A	50-300 parasites per mm3	20 or older	30	Male	N/A
Brazil	PV 38	N/A	+	301-500 parasites per mm3	20 or older	48	Female	12
Brazil	PV 40	N/A	+++	10,001-100,000 parasites per mm3	20 or older	30	Male	N/A
Brazil	PV 41	N/A	+	301-500 parasites per mm3	20 or older	55	Male	N/A
Brazil	PV 42	N/A	N/A	50-300 parasites per mm3	20 or older	44	Male	16.2
Brazil	PV 43	N/A	++	501-10,000 parasites per mm3	20 or older	62	Female	11.4
Brazil	PV 44	N/A	+	301-500 parasites per mm3	20 or older	48	Female	N/A
Brazil	PV 45	N/A	++	501-10,000 parasites per mm3	20 or older	27	Male	11.6
Brazil	PV 46	N/A	N/A	50-300 parasites per mm3	20 or older	49	Male	14.9
Brazil	PV 47	N/A	++	501-10,000 parasites per mm3	20 or older	26	Female	10.9
Brazil	PV 48	N/A	++	501-10,000 parasites per mm3	20 or older	89	Female	11.7
Brazil	PV 49	N/A	++	501-10,000 parasites per mm3	20 or older	29	Male	N/A
Brazil	PV 50	N/A	+	301-500 parasites per mm3	20 or older	44	Male	N/A
Brazil	PV 51	N/A	++	501-10,000 parasites per mm3	20 or older	31	Male	14.1
Brazil	PV 52	N/A	++	501-10,000 parasites per mm3	20 or older	41	Male	12.9
Brazil	PV 53	N/A	++	501-10,000 parasites per mm3	20 or older	34	Male	12.1
Brazil	PV 54	N/A	+	301-500 parasites per mm3	20 or older	64	Female	12.9
Brazil	PV 55	N/A	+++	10,001-100,000 parasites per mm3	20 or older	40	Male	N/A
Brazil	PV 56	N/A	+++	10,001-100,000 parasites per mm3	20 or older	47	Male	N/A
Brazil	PV 57	N/A	+++	10,001-100,000 parasites per mm3	20 or older	43	Male	N/A
Brazil	PV 58	N/A	+	301-500 parasites per mm3	20 or older	39	Male	N/A
Brazil	PV 59	N/A	1/2 +	50-300 parasites per mm3	20 or older	44	Male	15.8
Brazil	PV 60	N/A	N/A	50-300 parasites per mm3	20 or older	33	Male	15.2
Brazil	PV 61	N/A	+	301-500 parasites per mm3	20 or older	51	Male	13.5
Brazil	PV 62	N/A	++	501-10,000 parasites per mm3	20 or older	53	Male	13.3
Brazil	PV 63	N/A	++	501-10,000 parasites per mm3	20 or older	66	Male	N/A
Brazil	PV 64	N/A	+	301-500 parasites per mm3	20 or older	39	Male	N/A
Brazil	PV 65	N/A	+	301-500 parasites per mm3	20 or older	26	Male	16.7
Brazil	PV 66	N/A	++	501-10,000 parasites per mm3	20 or older	64	Male	15.6
Brazil	PV 67	N/A	++	501-10,000 parasites per mm3	20 or older	57	Male	N/A
Brazil	PV 68	N/A	++	501-10,000 parasites per mm3	20 or older	43	Male	N/A
Brazil	PV 69	N/A	+	301-500 parasites per mm3	20 or older	40	Male	15.3
Brazil	PV 70	N/A	++	501-10,000 parasites per mm3	20 or older	40	Male	11.8
Brazil	PV 71	N/A	++	501-10,000 parasites per mm3	20 or older	46	Male	13.2
Brazil	PV 72	N/A	N/A	50-300 parasites per mm3	20 or older	37	Male	14.5
Brazil	PV 73	N/A	++	501-10,000 parasites per mm3	20 or older	50	Female	N/A
Brazil	PV 74	N/A	++	501-10,000 parasites per mm3	20 or older	42	Male	N/A
Brazil	PV 75	N/A	++	501-10,000 parasites per mm3	20 or older	50	Male	N/A
Brazil	PV 76	N/A	N/A	50-300 parasites per mm3	20 or older	43	Male	N/A
Cambodia	PV0332	18746	+++	10,001-100,000 parasites per mm3	20 or older	20	Female	11.7
Cambodia	PV0333	8552	++	501-10,000 parasites per mm3	20 or older	39	Male	15.5
Cambodia	PV0334	1042	++	501-10,000 parasites per mm3	10-19 years old	13	Female	13.7
Cambodia	PV0335	3640	++	501-10,000 parasites per mm3	20 or older	27	Female	13.2
Cambodia	PV0336	375	+	301-500 parasites per mm3	20 or older	23	Male	18.1
Cambodia	PV0337	2333	++	501-10,000 parasites per mm3	10-19 years old	16	Female	12.8
Cambodia	PV0338	5581	++	501-10,000 parasites per mm3	20 or older	28	Female	14.7
Cambodia	PV0339	1981	++	501-10,000 parasites per mm3	20 or older	24	Male	15.2
Cambodia	PV0340	7926	++	501-10,000 parasites per mm3	10-19 years old	15	Male	15.6
Cambodia	PV0341	28985	+++	10,001-100,000 parasites per mm3	10-19 years old	12	Male	11.9
Cambodia	PV0342	3040	++	501-10,000 parasites per mm3	20 or older	25	Male	16.5
Cambodia	PV0343	95	1/2 +	50-300 parasites per mm3	10-19 years old	18	Male	16.8
Cambodia	PV0344	19607	+++	10,001-100,000 parasites per mm3	20 or older	30	Female	12.2
Cambodia	PV0345	600	++	501-10,000 parasites per mm3	20 or older	20	Male	16
Cambodia	PV0346	466	+	301-500 parasites per mm3	1-9 years old	9	Female	14
Cambodia	PV0347	207	1/2 +	50-300 parasites per mm3	10-19 years old	13	Male	14.7
Cambodia	PV0348	44166	+++	10,001-100,000 parasites per mm3	20 or older	21	Male	12.7
Cambodia	PV0349	1688	++	501-10,000 parasites per mm3	20 or older	38	Female	18
Cambodia	PV0350	16550	+++	10,001-100,000 parasites per mm3	10-19 years old	16	Female	14.1
Cambodia	PV0352	256	1/2 +	50-300 parasites per mm3	20 or older	39	Male	13.2
Cambodia	PV0353	20518	+++	10,001-100,000 parasites per mm3	10-19 years old	18	Male	17.2
Cambodia	PV0354	559	++	501-10,000 parasites per mm3	20 or older	22	Male	16.4
Cambodia	PV0355	25387	+++	10,001-100,000 parasites per mm3	10-19 years old	16	Male	14.6
Cambodia	PV0356	29777	+++	10,001-100,000 parasites per mm3	1-9 years old	6	Male	12.9
Cambodia	PV0357	421	+	301-500 parasites per mm3	10-19 years old	19	Male	17.6
Cambodia	PV0358	6420	++	501-10,000 parasites per mm3	20 or older	38	Male	15
Cambodia	PV0359	169	1/2 +	50-300 parasites per mm3	10-19 years old	14	Male	14.5
Cambodia	PV0360	79	1/2 +	50-300 parasites per mm3	20 or older	30	Male	18.6
Cambodia	PV0361	727	++	501-10,000 parasites per mm3	10-19 years old	10	Male	11.8
Cambodia	PV0362	19594	+++	10,001-100,000 parasites per mm3	1-9 years old	4	Male	9.8
Cambodia	PV0363	2955	++	501-10,000 parasites per mm3	20 or older	40	Male	15.5
Cambodia	PV0364	21291	+++	10,001-100,000 parasites per mm3	20 or older	20	Male	13.7
Cambodia	PV0365	9500	++	501-10,000 parasites per mm3	10-19 years old	18	Male	16
Cambodia	PV0366	2702	++	501-10,000 parasites per mm3	10-19 years old	15	Male	14.8
Cambodia	PV0367	14288	+++	10,001-100,000 parasites per mm3	20 or older	44	Female	11.4
Cambodia	PV0368	10819	+++	10,001-100,000 parasites per mm3	20 or older	54	Female	12.7
Cambodia	PV0369	5550	++	501-10,000 parasites per mm3	20 or older	32	Male	15.2
Cambodia	PV0370	4978	++	501-10,000 parasites per mm3	10-19 years old	19	Female	17.5
Cambodia	PV0371	2556	++	501-10,000 parasites per mm3	10-19 years old	18	Male	14.9
Cambodia	PV0372	12080	+++	10,001-100,000 parasites per mm3	10-19 years old	19	Male	13.8
Cambodia	PV0373	19726	+++	10,001-100,000 parasites per mm3	20 or older	44	Male	12.5
Cambodia	PV0374	6151	++	501-10,000 parasites per mm3	20 or older	39	Male	14
Cambodia	PV0375	141	1/2 +	50-300 parasites per mm3	1-9 years old	3	Female	11.3
Cambodia	PV0376	32191	+++	10,001-100,000 parasites per mm3	20 or older	53	Male	13.7
Cambodia	PV0377	923	++	501-10,000 parasites per mm3	20 or older	41	Male	15.1
Cambodia	PV0378	7014	++	501-10,000 parasites per mm3	10-19 years old	8	Female	9.4
Cambodia	PV0379	111	1/2 +	50-300 parasites per mm3	20 or older	26	Male	15.1
Cambodia	PV0380	901	++	501-10,000 parasites per mm3	10-19 years old	17	Male	13.5
Cambodia	PV0381	5544	++	501-10,000 parasites per mm3	1-9 years old	7	Male	9.8
Cambodia	PV0382	32176	+++	10,001-100,000 parasites per mm3	20 or older	25	Male	13
Cambodia	PV0383	5134	++	501-10,000 parasites per mm3	20 or older	21	Male	12.5
Cambodia	PV0384	25073	+++	10,001-100,000 parasites per mm3	20 or older	23	Male	11.3
Cambodia	PV0385	8071	++	501-10,000 parasites per mm3	20 or older	21	Female	14.2
Cambodia	PV0386	13543	+++	10,001-100,000 parasites per mm3	20 or older	42	Male	14.7
Cambodia	PV0388	10325	+++	10,001-100,000 parasites per mm3	20 or older	23	Male	14.3
Cambodia	PV0389	1384	++	501-10,000 parasites per mm3	20 or older	44	Male	12.6
Cambodia	PV0390	338	+	301-500 parasites per mm3	10-19 years old	15	Male	10.8
Cambodia	PV0391	6601	++	501-10,000 parasites per mm3	20 or older	30	Male	13.6
Cambodia	PV0392	10923	+++	10,001-100,000 parasites per mm3	10-19 years old	15	Male	14.4
Cambodia	PV0393	38909	+++	10,001-100,000 parasites per mm3	20 or older	41	Male	12.4
Cambodia	PV0394	6792	++	501-10,000 parasites per mm3	20 or older	25	Male	12.8
Cambodia	PV0395	141	1/2 +	50-300 parasites per mm3	10-19 years old	15	Male	11.3
Cambodia	PV0396	21617	+++	10,001-100,000 parasites per mm3	20 or older	29	Male	9.7
Cambodia	PV0397	21595	+++	10,001-100,000 parasites per mm3	10-19 years old	17	Male	13.2
Cambodia	PV0398	3200	++	501-10,000 parasites per mm3	20 or older	48	Male	11.8
Cambodia	PV0399	29403	+++	10,001-100,000 parasites per mm3	10-19 years old	16	Female	10.2
Cambodia	PV0400	6074	++	501-10,000 parasites per mm3	10-19 years old	18	Male	12.2
Cambodia	PV0401	486	+	301-500 parasites per mm3	10-19 years old	19	Male	14.4
Cambodia	PV0402	11360	+++	10,001-100,000 parasites per mm3	20 or older	44	Male	14.4
Cambodia	PV0403	21164	+++	10,001-100,000 parasites per mm3	1-9 years old	4	Male	10.3
Cambodia	PV0404	135	1/2 +	50-300 parasites per mm3	20 or older	24	Male	13.8
Cambodia	PV0405	20180	+++	10,001-100,000 parasites per mm3	20 or older	27	Male	14.6
Cambodia	PV0406	203	1/2 +	50-300 parasites per mm3	1-9 years old	4	Female	9.3
Cambodia	PV0407	1868	++	501-10,000 parasites per mm3	20 or older	30	Male	14
Cambodia	PV0408	125	1/2 +	50-300 parasites per mm3	20 or older	34	Male	12.8
Cambodia	PV0409	579	++	501-10,000 parasites per mm3	20 or older	45	Male	12.1
Cambodia	PV0410	322	+	301-500 parasites per mm3	20 or older	25	Male	13
Cambodia	PV0411	6145	++	501-10,000 parasites per mm3	20 or older	20	Male	13.2
Cambodia	PV0412	4892	++	501-10,000 parasites per mm3	10-19 years old	17	Female	11.4
